# Supplementary material for: Concentration and Quantification of SARS-CoV-2 RNA in Wastewater Using Polyethylene Glycol-Based Concentration and qRT-PCR
Source: MDPI journal article supplement (doi:10.3390/mps4010017), 2021-02-23
Supplement: s1 [file s1]

## Supplementary Information

Concentration and quantification of SARS-CoV-2 RNA in wastewater using polyethylene glycol-based concentration and qRT-PCR

Kata Farkas 1, 2\*, Luke S. Hillary 1, Jamie Thorpe 1, 2, David I. Walker<sup>3</sup>, James A. Lowther 3, James E. McDonald 1, Shelagh K. Malham 2 and Davey L. Jones 1, 4

1 School of Natural Sciences, Bangor University, Deiniol Road, Bangor, Gwynedd, UK

2 School of Ocean Sciences, Bangor University, Menai Bridge, Anglesey, UK

3 UK National Reference Laboratory for Foodborne Viruses, Centre for Environment, Fisheries and Aquaculture Science, Weymouth, UK

4 UWA School of Agriculture and Environment, The University of Western Australia, Perth, WA 6009, Australia

\* Correspondence: [fkata211@gmail.com](mailto:fkata211@gmail.com)

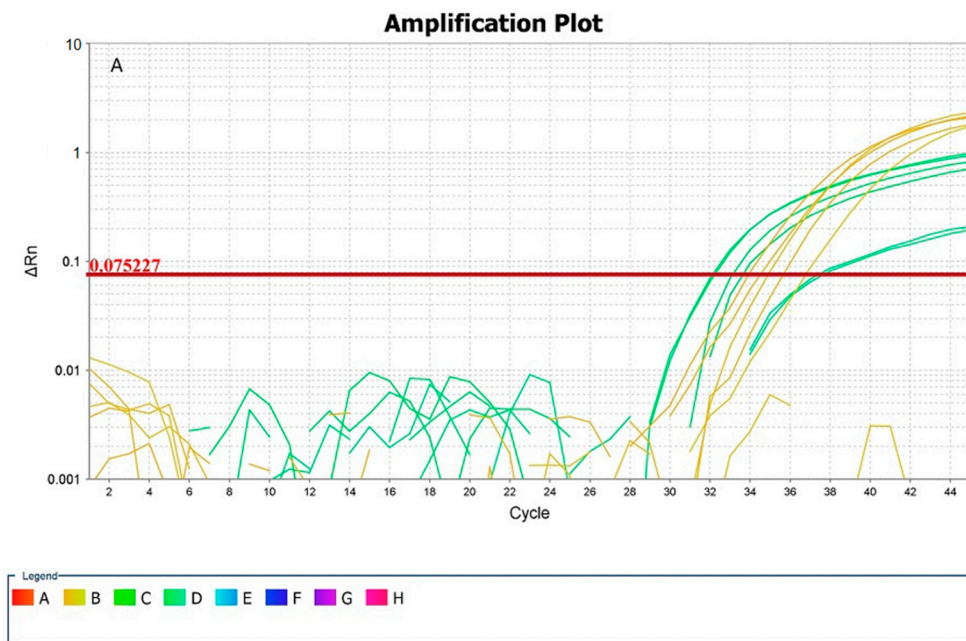

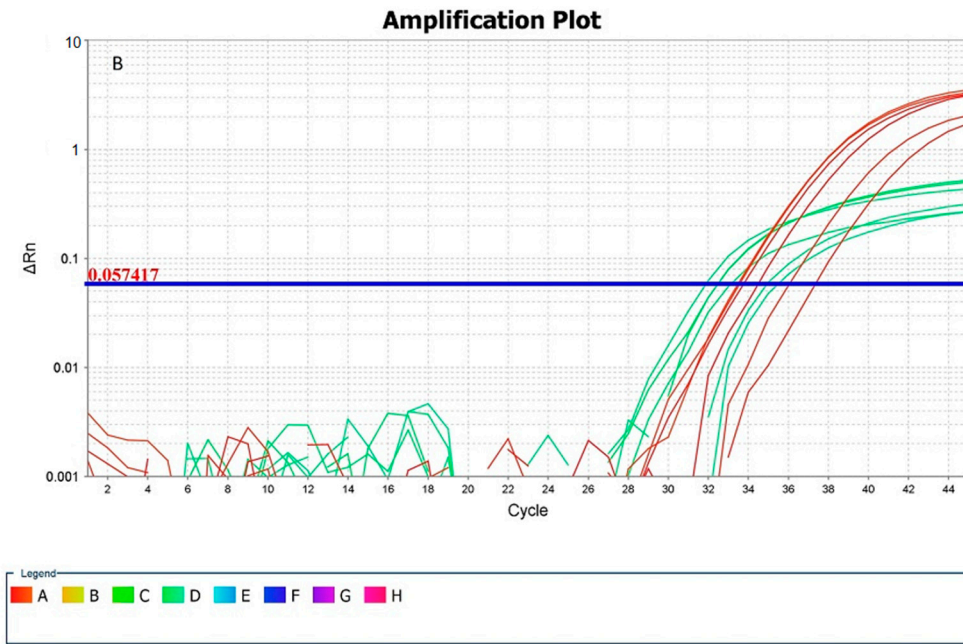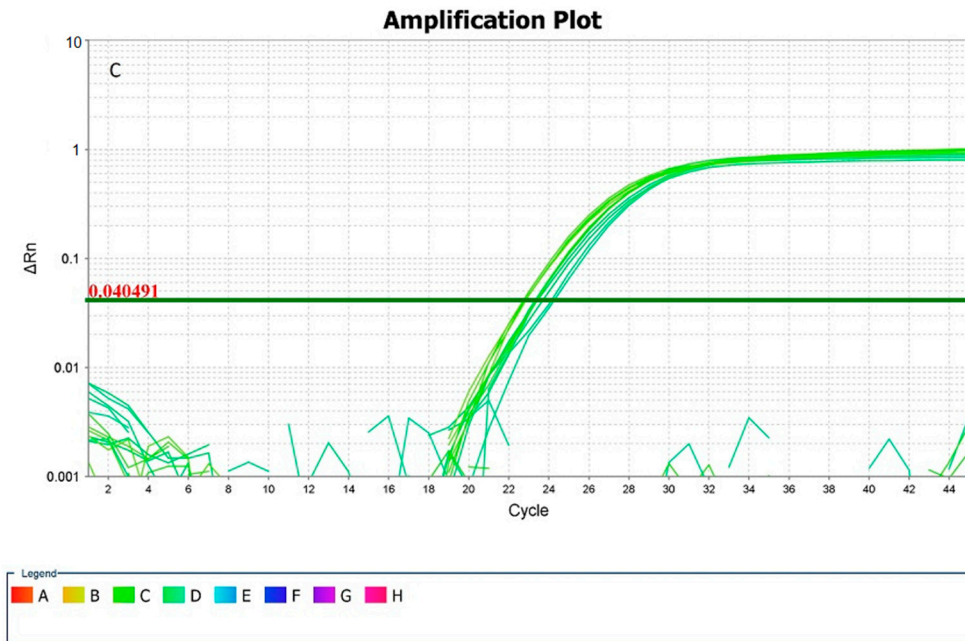

**Figure S1.** Amplification curves observed for the (A) N1 (singleplex: yellow curves, triplex: light green curves), (B) E (singleplex: red curves, triplex: light green curves) and (C) MNV (singleplex: green curves, triplex: light green curves).
